# Supplementary material
Source: Springer Nature journal article supplement (https://www.springermedizin.de/resource/supplementary/12933_2013_676_MOESM1_ESM.pdf/9539098)

A

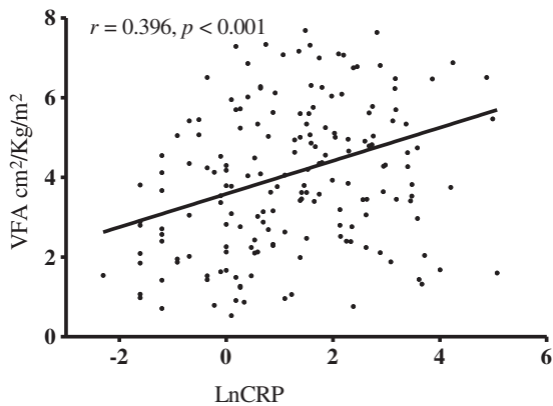

B

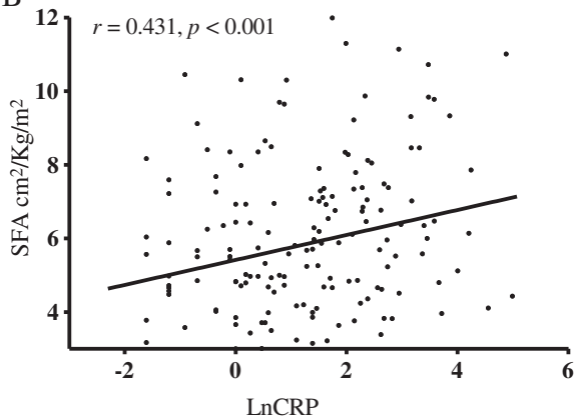

C

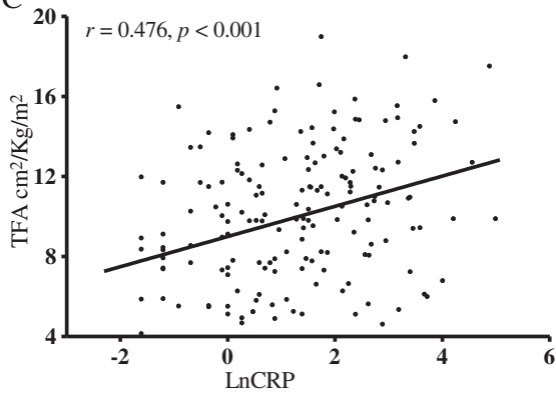

Supplement: MOESM1 [file 9539098]
